# Supplementary material for: A new sample preparation method for the absolute quantitation of a target proteome using 18O labeling combined with multiple reaction monitoring mass spectrometry
Source: Royal Society of Chemistry journal article supplement (doi:10.1039/c4an02092h), 2014-12-17
Supplement: c4an02092h1.pdf [file c4an02092h1.pdf]

**Supporting Information(SI)**

**A New Sample Preparation Method for the Absolute Quantitation of a  
Target Proteome using  $^{18}\text{O}$  Labeling Combined with Multiple Reaction**

**Monitoring Mass Spectrometry**

Jiabin Li<sup>#</sup>, Lianqi Zhou<sup>#</sup>, Huanhuan Wang, Hui Yan, Nannan Li, Rui Zhai, Fenglong  
Jiao, Feiran Hao, Zuyao Jin, Fang Tian, Bo Peng, Yangjun Zhang\*, Xiaohong Qian\*

State Key Laboratory of Proteomics, Beijing Proteome Research Center, Beijing  
Institute of Radiation Medicine, No. 33 Life Science Park Road, Changping District,  
Beijing 102206, P. R. China

**Table S1 57 peptides chosen from 22 drug-metabolizing enzymes**

| No. | Peptide sequence | GI number | protein name <sup>a</sup> |
|-----|------------------|-----------|---------------------------|
| 1   | IGSTPVLVLSR      | 73915100  | CYP 1A2                   |
| 2   | FLWFLQK          | 73915100  | CYP 1A2                   |
| 3   | ASGNLIPQEK       | 73915100  | CYP 1A2                   |
| 4   | GYGVVFSNGER      | 189339233 | CYP 2A6                   |
| 5   | GTGGANIDPTFFLSR  | 189339233 | CYP 2A6                   |
| 6   | GTEVYPMLGSVLR    | 189339233 | CYP 2A6                   |
| 7   | IAMVDPFFR        | 7949031   | CYP 2B6                   |
| 8   | DLIDTYLLHMEK     | 7949031   | CYP 2B6                   |
| 9   | EALIDNGEEFSGR    | 98991773  | CYP 2C8                   |
| 10  | DQNFLTLMK        | 98991773  | CYP 2C8                   |
| 11  | VQEEIDHVIGR      | 98991773  | CYP 2C8                   |
| 12  | GIFPLAER         | 13699818  | CYP 2C9                   |
| 13  | SHMPYTDAVVHEVQR  | 13699818  | CYP 2C9                   |
| 14  | GTILISLTSVLHDNK  | 13699818  | CYP 2C9                   |
| 15  | NLAFMESDILEK     | 4503219   | CYP 2C19                  |
| 16  | SNYFMPFSAGK      | 4503219   | CYP 2C19                  |
| 17  | GDLPAFHAHR       | 10834998  | CYP 2E1                   |
| 18  | EAHFLEALR        | 10834998  | CYP 2E1                   |
| 19  | FITLVPSNLPHEATR  | 10834998  | CYP 2E1                   |
| 20  | AFLTQLDELLTEHR   | 392513721 | CYP 2D6                   |
| 21  | DLTEAFLAEMEK     | 392513721 | CYP 2D6                   |
| 22  | DIEVQGFR         | 392513721 | CYP 2D6                   |
| 23  | SAISIAEDEEWK     | 13435386  | CYP 3A4                   |
| 24  | GVVVMIPSYALHR    | 13435386  | CYP 3A4                   |
| 25  | SAISLAEDEEWK     | 4503231   | CYP 3A5                   |
| 26  | DTINFLSK         | 4503231   | CYP 3A5                   |
| 27  | GHEIVVLAPDASLYIR | 8850236   | UGT 1A1                   |
| 28  | DGAFYTLK         | 8850236   | UGT 1A1                   |
| 29  | VLVVPIDGSHWLSMR  | 13487900  | UGT 1A3                   |
| 30  | YLSIPTVFFLR      | 13487900  | UGT 1A3                   |
| 31  | VLVVPTDGSPWLSMR  | 6005930   | UGT 1A4                   |
| 32  | YIPCDLDFK        | 6005930   | UGT 1A4                   |
| 33  | GTQCPNPSSYIPK    | 6005930   | UGT 1A4                   |
| 34  | DIVEVLSDR        | 45827765  | UGT 1A6                   |
| 35  | SFLTAPQTEYR      | 45827765  | UGT 1A6                   |
| 36  | DVDIITLYQK       | 45827765  | UGT 1A6                   |
| 37  | AFAHAQWK         | 11276085  | UGT 1A9                   |
| 38  | NHIMHLEEHLCHR    | 11276085  | UGT 1A9                   |
| 39  | TILDELVQR        | 149944509 | UGT 2B4                   |
| 40  | FSPGYAIEK        | 149944509 | UGT 2B4                   |
| 41  | ANVIASALAK       | 149944509 | UGT 2B4                   |
| 42  | TILDELIQR        | 190194389 | UGT 2B7                   |

|    |                   |           |          |
|----|-------------------|-----------|----------|
| 43 | IEIYPTSLTK        | 190194389 | UGT 2B7  |
| 44 | ANVIASALAQIPQK    | 190194389 | UGT 2B7  |
| 45 | TEFENIMQLVK       | 4507817   | UGT 2B10 |
| 46 | HSGGFIFPPSYVPVMSK | 4507817   | UGT 2B10 |
| 47 | FEVYPTSLTK        | 4507823   | UGT 2B11 |
| 48 | AVFWIEFVMPHK      | 4507823   | UGT 2B11 |
| 49 | NYLEDSLLK         | 116517299 | UGT 2B15 |
| 50 | FSVGYTFEK         | 116517299 | UGT 2B15 |
| 51 | SVINDPVYK         | 116517299 | UGT 2B15 |
| 52 | FAVFGLGNK         | 127139033 | POR      |
| 53 | GVATNWLR          | 127139033 | POR      |
| 54 | DGALTQLNVAFSR     | 127139033 | POR      |
| 55 | YTTLEEIQK         | 41281768  | Cyt b5   |
| 56 | STWLILHHK         | 41281768  | Cyt b5   |
| 57 | FLEEHPGGEEVLR     | 41281768  | Cyt b5   |

a, CYP, cytochrome P450; UGT, uridine 5'-diphosphoglucuronosyltransferase; Cyt: Cytochrome.

As shown in Figure S1, the number of peptides with one missed cleavage site after 16 h of digestion was selected to examine the digestion efficiency at different trypsin to protein ratios. For example, when fewer than 15 peptides with one missed cleavage site was chosen as the criterion, we found that the digestion times lasted more than 16 h, 10 h, 8 h, 6 h or 45 min when the digestion was performed at trypsin to protein ratios of 1:50, 1:25, 1:10, 1:5 and 1:1. The results indicated that the numbers of peptides with one missed cleavage site decreased as the trypsin to protein ratios increased.

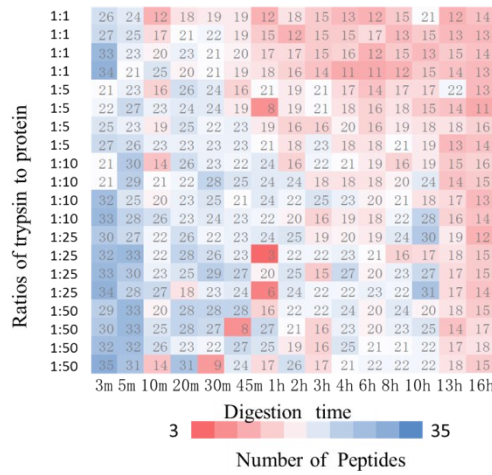

**Fig. S1** The numbers of peptides with one missed cleavage sites varies with time at different trypsin to protein ratios

Similarly, as shown in Figure S2, when, averagely, 7 peptides with two missed cleavage sites identified after 16 h digestion at different ratios of trypsin to protein is selected to examine the digestion efficiency, we found that digestion times lasted more than 16 h, 16 h, 13 h, 6 h or 1 h when the digestion at trypsin to protein ratios of 1:50, 1:25, 1:10, 1:5 and 1:1 was performed. These results further suggest that high trypsin concentration benefits complete digestion.

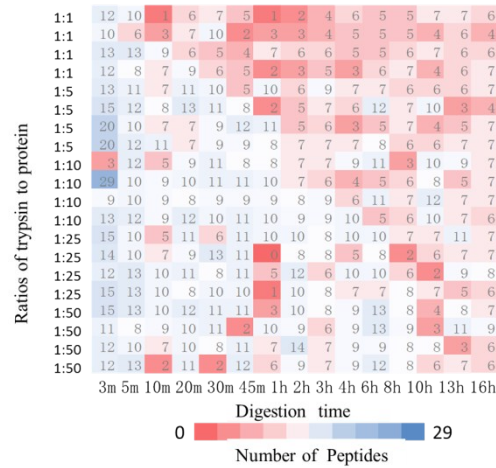

**Fig. S2** The numbers of peptides with two missed cleavage sites varies with time at different trypsin to protein ratios

As shown in Figure S3, when we chose 53 peptides with no more than two missed cleavage sites after 16 h of digestion at different ratios of trypsin to protein, at least 16 h, 16 h, 13 h, 2 h or 1 h were needed for digestion at trypsin to protein ratios of 1:50, 1:25, 1:10, 1:5 and 1:1, respectively. These results suggest that the numbers of peptides with no more than two missed cleavage sites decrease sharply when the trypsin to protein ratios increased. All statistical results suggest that a high ratio of trypsin to protein benefits complete digestion.

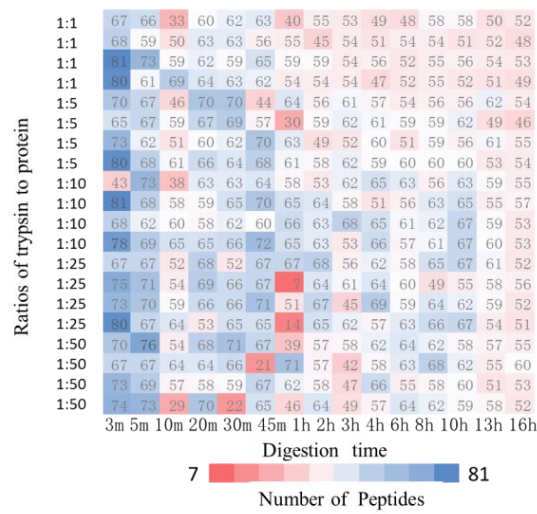

**Fig. S3** The numbers of peptides with two or fewer missed cleavage sites varies with time at different trypsin to protein ratios

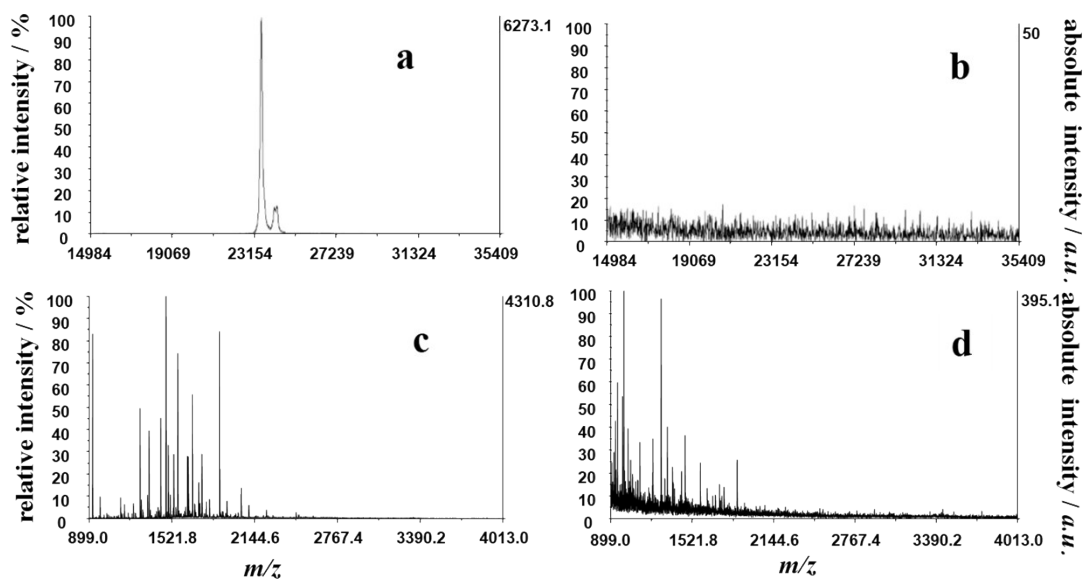

**Fig. S4** MALDI-TOF MS spectra of the original trypsin solution, BSA tryptic digest and their flowthrough fractions after loading samples on a reversed-phase pipette tip prepared in house. (a) original trypsin solution; (b) flowthrough fraction after loading trypsin on the reversed-phase pipette tip; (c) original BSA digest; (d) flowthrough fraction after loading BSA digest on the reversed-phase pipette tip

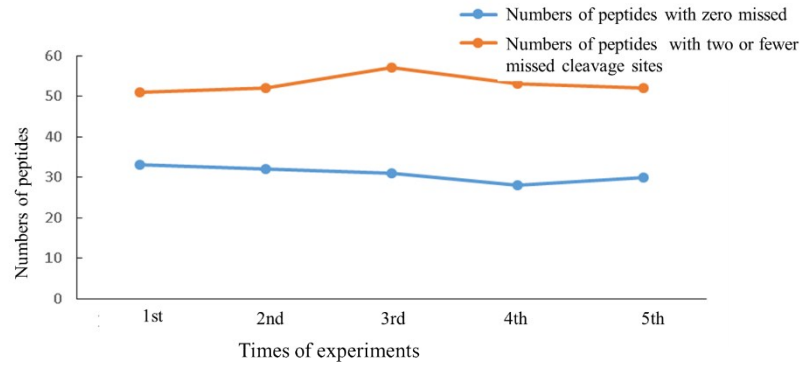

**Fig. S5** Numbers of peptides with zero missed cleavage sites or with two or fewer missed cleavage sites analyzed via MALDI-TOF MS of the BSA digest using trypsin recycled five times



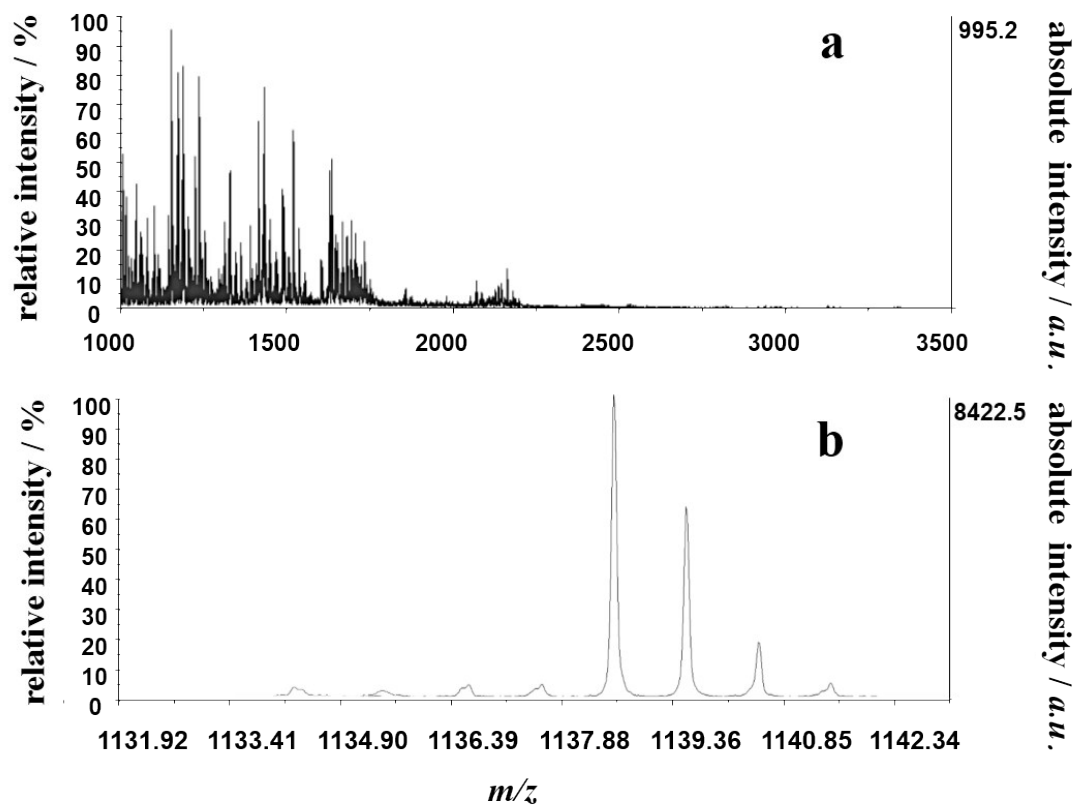

**Fig. S6** MALDI-TOF MS spectra of (a) a QconCAT digest and (b) one peptide YIPCDLDFK ( $m/z$  1134.4 unlabeled with  $^{18}\text{O}$ ,  $m/z$  1138.5 labeled with Two  $^{18}\text{O}$ ) of the QconCAT selected randomly

**Table S2.** MRM parameters and analytical precision of MRM assays based on tryptic peptides from 22 drug- metabolizing enzymes

| Proteins       | Peptide sequences | Q1 <sup>a</sup> (m/z) | Q3 <sup>b</sup> (m/z) | Linear equations      | R <sup>2</sup> | Quantitation | Average | RSD(%) |
|----------------|-------------------|-----------------------|-----------------------|-----------------------|----------------|--------------|---------|--------|
| CYP 1A2        | IGSTPVLVLSR       | 571.4                 | 783.5                 | y=36213.39x-894238.82 | 0.99           | 182.05       | 163.18  | 17.13% |
|                |                   |                       | 1028.6                | y=7560.79x-182590.45  | 0.99           | 177.95       |         |        |
|                |                   |                       | 587.4                 | y=5637.34x-118878     | 0.99           | 214.97       |         |        |
|                | FLWFLQK           | 491.3                 | 721.4                 | y=1481.11x-37911.32   | 0.97           | 127.00       |         |        |
|                |                   |                       | 388.3                 | y=260.81x-3614.61     | 0.96           | 136.18       |         |        |
|                |                   |                       | 501.3                 | y=20246.78x+116796.08 | 0.99           | 157.91       |         |        |
| ASGNLIPQEK     | 528.8             | 614.4                 | y=7107.12x+57940.17   | 0.99                  | 153.48         |              |         |        |
|                |                   | 898.5                 | y=1761.3x+17317.26    | 1                     | 155.93         |              |         |        |
|                |                   | 709.3                 | y=1549.9x-30733.6     | 0.98                  | 43.54          |              |         |        |
| CYP 2A6        | GYGVVFSNGER       | 592.8                 | 808.4                 | y=2066.6x-58627.48    | 0.97           | 42.00        | 40.47   | 17.19% |
|                |                   |                       | 562.3                 | y=532.26x-5816.91     | 0.95           | 44.81        |         |        |
|                |                   |                       | 867.5                 | y=20895.11x-912973.11 | 0.95           | 45.70        |         |        |
|                | GTGGANIDPTFFLSR   | 776.9                 | 982.5                 | y=14309.68x-642552.76 | 0.97           | 37.77        |         |        |
|                |                   |                       | 872.5                 | y=9390.25x-393417.13  | 0.99           | 25.81        |         |        |
|                |                   |                       | 1035.6                | y=3221.06x-122834.61  | 0.99           | 43.64        |         |        |
| GTEVYPMLGSLVLR | 711.4             | 780.4                 | y=4053.21x-175543.01  | 0.98                  | 20.18          |              |         |        |
|                |                   | 566.3                 | y=20521.13x-857118.12 | 0.99                  | 15.44          |              |         |        |
|                |                   | 933.5                 | y=2807.58x-152636.45  | 0.95                  | 23.95          |              |         |        |
| CYP 2E6        | IAMVDPFFR         | 548.3                 | 657.3                 | y=2907.78x-129241.8   | 0.96           | 20.51        | 19.82   | 15.46% |
|                |                   |                       | 770.4                 | y=3085.86x-128558.64  | 0.96           | 18.99        |         |        |
|                | DLIDTYLLHMEK      | 745.9                 | 866.5                 | y=4470.27x-75806.97   | 0.99           | 17.24        |         |        |
|                |                   |                       | 492.3                 | y=2610.03x-46087.89   | 0.99           | 18.69        |         |        |
| CYP 2C8        | DQNFLTLMK         | 555.3                 | 605.4                 | y=2876.86x-70151.95   | 0.99           | 20.94        | 17.97   | 5.72%  |
|                |                   |                       | 668.3                 | y=3537.63x-139281.97  | 0.98           | 66.10        |         |        |
|                |                   |                       | 767.4                 | y=3146.49x-134857.46  | 0.98           | 66.97        |         |        |
| CYP 2C9        | SHMPYTDAVVHEVQR   | 590.3                 | 937.5                 | y=1436.49x-61066.57   | 0.98           | 67.73        | 66.93   | 1.22%  |
|                |                   |                       | 668.3                 | y=3537.63x-139281.97  | 0.98           | 66.10        |         |        |
|                |                   |                       | 767.4                 | y=3146.49x-134857.46  | 0.98           | 66.97        |         |        |
| CYP 2C19       | NLAFMESDILEK      | 705.4                 | 1111.5                | y=2010.76x-53287.3    | 0.99           | 26.62        | 28.80   | 7.75%  |
|                |                   |                       | 968.5                 | y=1101.8x-35023.2     | 0.99           | 31.08        |         |        |
|                |                   |                       | 1186.6                | y=1032.29x-40620.66   | 0.99           | 28.71        |         |        |
| CYP 2E1        | GDLPAFHHR         | 560.8                 | 520.3                 | y=4146.32x-31569.78   | 0.99           | 42.73        | 59.55   | 20.07% |
|                |                   |                       | 835.4                 | y=9098.51x-98542.81   | 0.98           | 42.98        |         |        |
|                |                   |                       | 861.5                 | y=6851.46x-312242.19  | 0.96           | 68.77        |         |        |
|                | EAHFLLEALR        | 599.8                 | 714.5                 | y=6051.51x-266057.11  | 0.96           | 68.44        |         |        |
|                |                   |                       | 601.4                 | y=3129.77x-130049.51  | 0.96           | 68.76        |         |        |
|                |                   |                       | 1121.6                | y=22181.19x-870989.88 | 0.98           | 58.56        |         |        |
| CYP 2D6        | DLTEAFLAEMEK      | 848.0                 | 1220.6                | y=446.25x-7175.61     | 0.98           | 66.62        | 37.25   | 5.09%  |
|                |                   |                       | 867.4                 | y=3721.56x-167883.07  | 0.96           | 34.86        |         |        |
|                |                   |                       | 607.3                 | y=2482.48x-113295.02  | 0.95           | 35.45        |         |        |
| CYP 3A4        | GVVVMIPSYALHR     | 482.2                 | 720.4                 | y=2621.99x-121476.18  | 0.95           | 36.56        | 38.65   |        |
|                |                   |                       | 735.4                 | y=12105.88x-68147.44  | 0.99           | 39.53        |         |        |
|                |                   |                       | 606.3                 | y=5994.92x-46870.87   | 0.99           | 38.65        |         |        |
|                |                   |                       | 507.3                 | y=3588.53x-17136.35   | 1              | 38.42        |         |        |
| CYP 3A4        | GVVVMIPSYALHR     | 721.4                 | 843.4                 | y=3758.35x-117995.06  | 0.98           | 23.42        | 22.35   |        |
|                |                   |                       | 1087.6                | y=853.58x-14834.98    | 0.97           | 22.35        |         |        |

|          |                 |       |           |                         |                        |        |        |        |       |
|----------|-----------------|-------|-----------|-------------------------|------------------------|--------|--------|--------|-------|
| CYP 3A5  | DTINFLSK        | 469.3 | 835.3     | $y=2546.12x-51193.03$   | 0.96                   | 21.19  | 23.98  | 10.57% |       |
|          |                 |       | 721.4     | $y=9113.2x-314735.97$   | 0.96                   | 26.14  |        |        |       |
|          |                 |       | 608.3     | $y=6376.8x-203124.87$   | 0.96                   | 24.62  |        |        |       |
| UGT 1A1  | DGAFYTLK        | 457.7 | 524.3     | $y=2472.93x+35563.45$   | 0.97                   | 8.06   | 9.78   | 18.21% |       |
|          |                 |       | 361.2     | $y=1069.46x+22267.83$   | 0.98                   | 9.67   |        |        |       |
|          |                 |       | 973.5     | $y=260.97x+2292.57$     | 0.96                   | 130.66 |        |        |       |
| UGT 1A3  | VLVVPIDGSHWLSMR | 855.0 | 1298.6    | $y=458.17x-6730.44$     | 0.98                   | 101.85 | 116.25 | 17.52% |       |
|          |                 |       | 1246.6    | $y=4303.75x-109154.39$  | 0.97                   | 58.10  |        |        |       |
| UGT 1A4  | VLVVPTDGSPWLSMR | 828.9 | 933.5     | $y=1993.43x+74264.09$   | 0.98                   | 48.34  | 59.08  | 9.67%  |       |
|          |                 |       | 789.4     | $y=769.98x-13470.74$    | 0.98                   | 64.97  |        |        |       |
|          |                 |       | 585.8     | 894.4                   | $y=15137.93x-354295.6$ | 0.99   |        |        | 62.13 |
|          |                 |       | YIPCDLDFK | 637.3                   | $y=1119.05x-6284.54$   | 0.99   |        |        | 61.18 |
|          |                 |       |           | 797.3                   | $y=1819.95x-13873.92$  | 0.99   |        |        | 61.15 |
| UGT 1A6  | DIVEVLSDR       | 523.3 | 724.8     | $y=12271.07x-401305.47$ | 0.98                   | 53.77  | 26.36  | 15.51% |       |
|          |                 |       | 791.4     | $y=3556.94x-143621.51$  | 0.97                   | 55.71  |        |        |       |
|          |                 |       | 905.5     | $y=670.86x-13891.83$    | 0.99                   | 66.34  |        |        |       |
|          |                 |       | 817.4     | $y=11995.76x-185284.47$ | 1                      | 23.51  |        |        |       |
|          |                 |       | 718.4     | $y=12442.71x-192096.99$ | 1                      | 23.89  |        |        |       |
| UGT 1A6  | SFLTAPQTEYR     | 656.8 | 589.3     | $y=8982.21x-120005.11$  | 1                      | 24.26  | 26.36  | 15.51% |       |
|          |                 |       | 793.4     | $y=21878.21x-548043.85$ | 0.99                   | 20.46  |        |        |       |
|          |                 |       | 965.5     | $y=10772.73x-263090.31$ | 0.99                   | 25.66  |        |        |       |
|          |                 |       | 864.4     | $y=6964.74x-150174.16$  | 1                      | 25.27  |        |        |       |
|          |                 |       | 993.6     | $y=3344.31x-103090.14$  | 0.96                   | 30.46  |        |        |       |
| UGT 1A9  | AFAHAQWK        | 479.7 | 604.3     | $y=4519.47x-132929.62$  | 0.96                   | 31.10  | 54.66  | 3.86%  |       |
|          |                 |       | 765.5     | $y=2636.42x-80497.7$    | 0.96                   | 32.63  |        |        |       |
|          |                 |       | 652.4     | $y=3476.25x-69086.8$    | 1                      | 56.88  |        |        |       |
|          |                 |       | 532.3     | $y=5354.59x-142128.68$  | 1                      | 52.69  |        |        |       |
|          |                 |       | 740.4     | $y=3419.7x-101763.25$   | 1                      | 54.41  |        |        |       |
| UGT 2B4  | TILDELVQR       | 543.8 | 872.5     | $y=35442.4x-1358536.28$ | 0.98                   | 73.65  | 83.73  | 11.65% |       |
|          |                 |       | 644.4     | $y=8689.22x-338672.57$  | 0.95                   | 72.34  |        |        |       |
|          |                 |       | 759.4     | $y=13289.37x-428197.1$  | 0.98                   | 72.55  |        |        |       |
|          |                 |       | 777.4     | $y=10345.45x-337.08$    | 1                      | 86.77  |        |        |       |
|          |                 |       | 680.4     | $y=4118.63x+2350.65$    | 0.99                   | 86.79  |        |        |       |
| UGT 2B7  | IEIYPTSLTK      | 582.8 | 506.3     | $y=942.44x+6177.41$     | 0.98                   | 82.49  | 97.09  | 5.31%  |       |
|          |                 |       | 460.3     | $y=9809.69x-65579.43$   | 0.98                   | 91.03  |        |        |       |
|          |                 |       | 673.4     | $y=7059.07x+12384.54$   | 0.97                   | 101.79 |        |        |       |
|          |                 |       | 560.3     | $y=4099.81x-27407.55$   | 0.98                   | 86.13  |        |        |       |
|          |                 |       | 772.5     | $y=11837.97x-121520.76$ | 0.99                   | 103.05 |        |        |       |
| UGT 2B10 | TEFENIIMQLVK    | 732.9 | 922.5     | $y=9958.01x-214468.42$  | 0.99                   | 93.99  | 180.03 | 3.65%  |       |
|          |                 |       | 809.4     | $y=7943.5x-144344.39$   | 0.99                   | 94.23  |        |        |       |
|          |                 |       | 958.6     | $y=692.49x-4394.9$      | 0.96                   | 184.68 |        |        |       |
| UGT 2B11 | FEVYPTSLTK      | 592.8 | 844.5     | $y=363.11x+7281.94$     | 0.96                   | 175.39 | 86.91  | 3.82%  |       |
|          |                 |       | 809.4     | $y=8365.42x-172273.42$  | 0.99                   | 84.56  |        |        |       |
| UGT 2B15 | NYLEDLLK        | 547.8 | 809.4     | $y=13160.59x-209073.57$ | 0.99                   | 89.25  | 65.73  | 11.62% |       |
|          |                 |       | 704.4     | $y=5265.94x-101042.66$  | 1                      | 67.32  |        |        |       |
|          |                 |       | 575.3     | $y=1761.2x-33793.4$     | 0.99                   | 61.22  |        |        |       |
| UGT 2B15 | SVINDPVYK       | 517.8 | 460.3     | $y=1200.97x-5628.95$    | 0.99                   | 53.15  | 69.41  | 11.62% |       |
|          |                 |       | 848.5     | $y=11635.85x-115621.45$ | 0.99                   | 69.41  |        |        |       |
|          |                 |       | 506.3     | $y=5486.76x-12276.67$   | 0.99                   | 75.33  |        |        |       |

|        |           |       |       |                        |      |        |        |        |
|--------|-----------|-------|-------|------------------------|------|--------|--------|--------|
| POR    | GVATNWLR  |       | 735.4 | $y=5765.06x-15953.22$  | 0.99 | 67.96  | 103.50 | 10.69% |
|        |           |       | 760.4 | $y=5444.56x-201719.83$ | 0.95 | 105.67 |        |        |
|        |           |       | 588.3 | $y=1205.95x-38136.62$  | 0.96 | 118.52 |        |        |
|        |           |       | 409.2 | $y=430.84x+28734.48$   | 0.96 | 93.47  |        |        |
|        |           |       | 806.5 | $y=858.83x-11174.18$   | 0.99 | 91.78  |        |        |
| Cyt b5 | YITLEEIQK | 593.8 | 696.4 | $y=586.4x-155.53$      | 0.99 | 108.08 | 576.71 | 5.12%  |
|        |           |       | 860.5 | $y=13201.99x-224731.1$ | 0.98 | 546.30 |        |        |
|        |           |       | 646.3 | $y=3171.29x-52545.23$  | 0.98 | 605.26 |        |        |
|        |           |       | 759.4 | $y=3522.65x-58297.85$  | 0.99 | 578.56 |        |        |
|        |           |       |       |                        |      |        |        |        |

<sup>a</sup> Endogenous peptide precursor  $m/z$ ; <sup>b</sup> Fragment ion.
